# Supplementary material for: Atomically dispersed Fe–Nxspecies within a porous carbon framework: an efficient catalyst for Li–CO2batteries
Source: Royal Society of Chemistry journal article supplement (doi:10.1039/d1nr08354f), 2022-01-01
Supplement: d1nr08354f1.pdf [file d1nr08354f1.pdf]

### Supporting Information

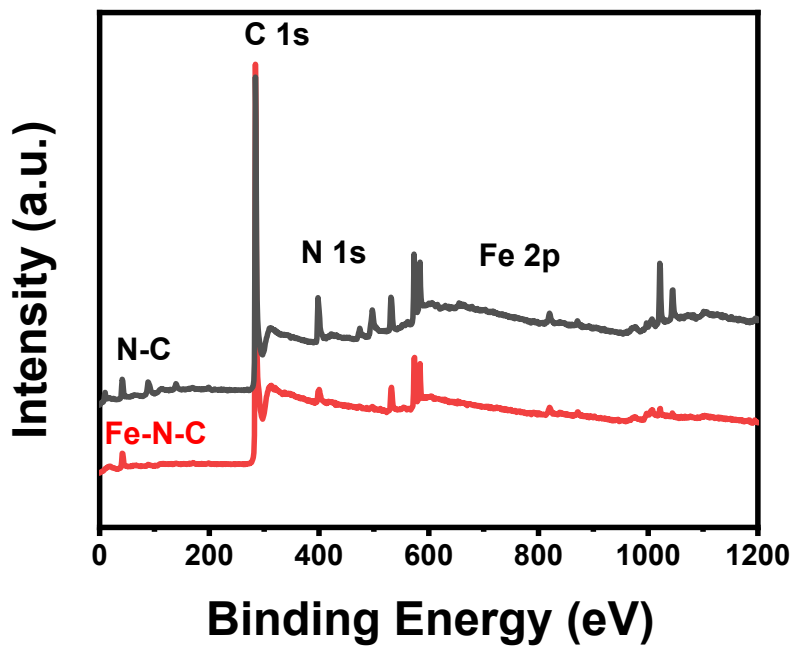

Figure S1. XPS survey of the Fe-N-C and N-C samples.

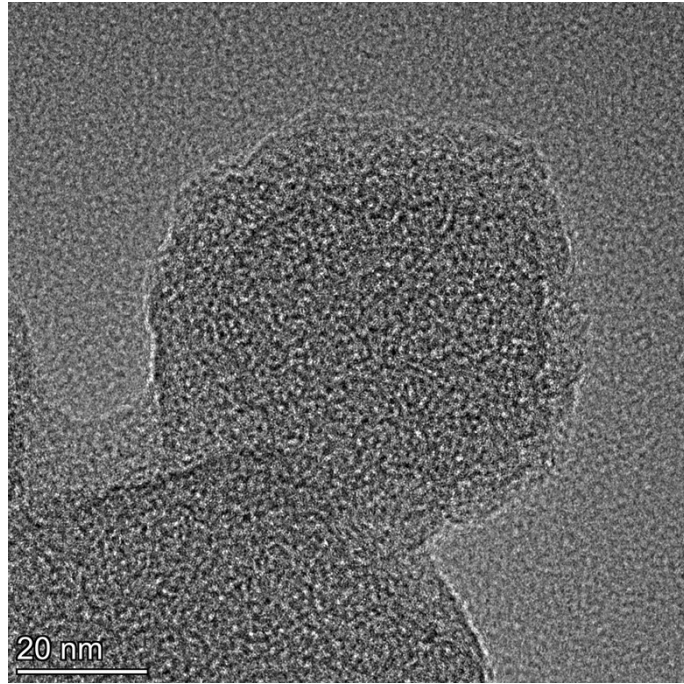

**Figure S2.** HRTEM image of the Fe-N-C sample.

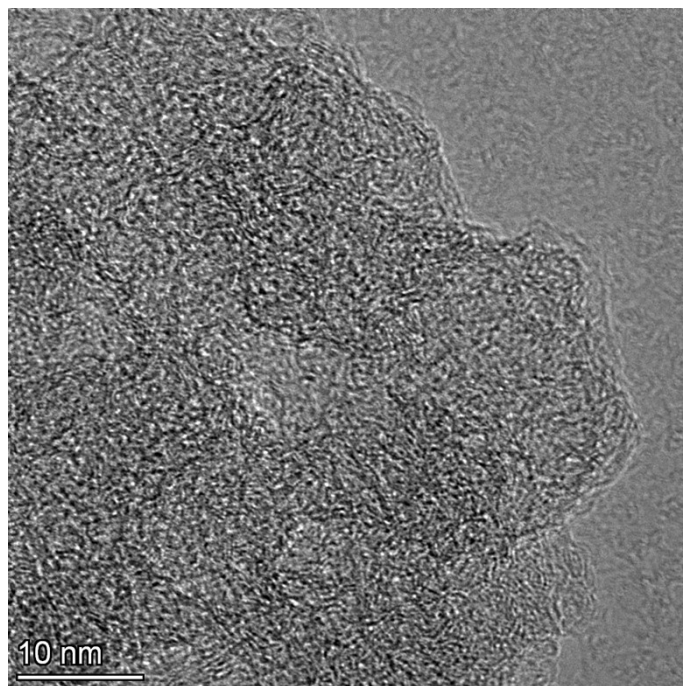

Figure S3. HRTEM image of the N-C sample.

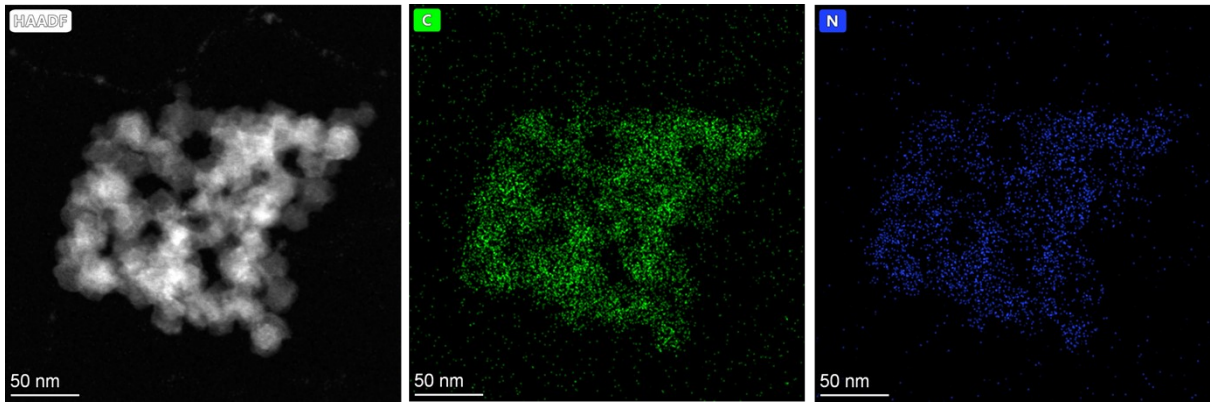

Figure S4. HAADF-STEM image and element mapping images of the N-C sample.

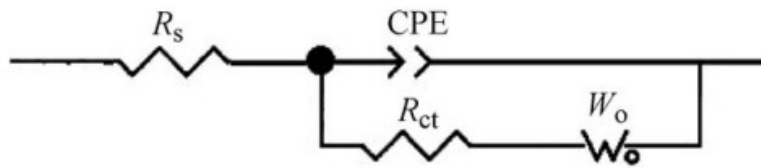

Figure S5. The equivalent circuit diagram for EIS of the samples.

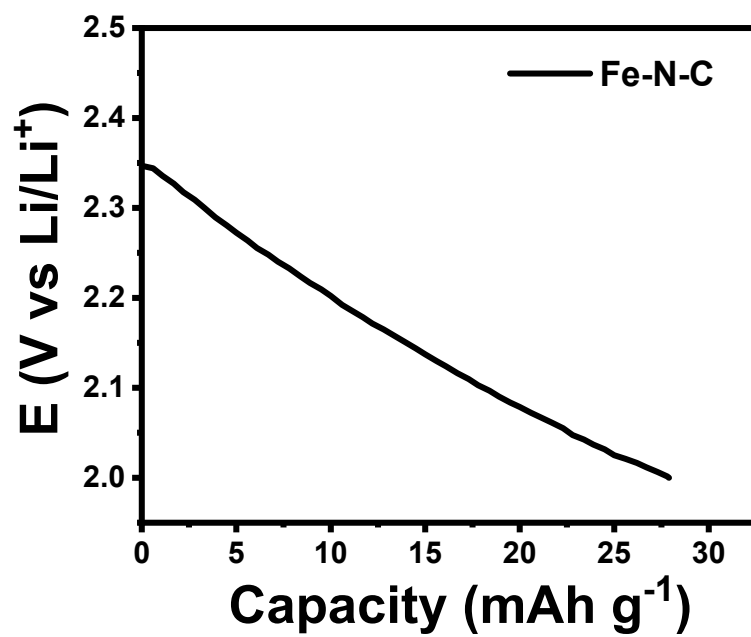

Figure S6. Discharge curve of the Fe-N-C cathode under Ar atmosphere (200 mA g<sup>-1</sup>).

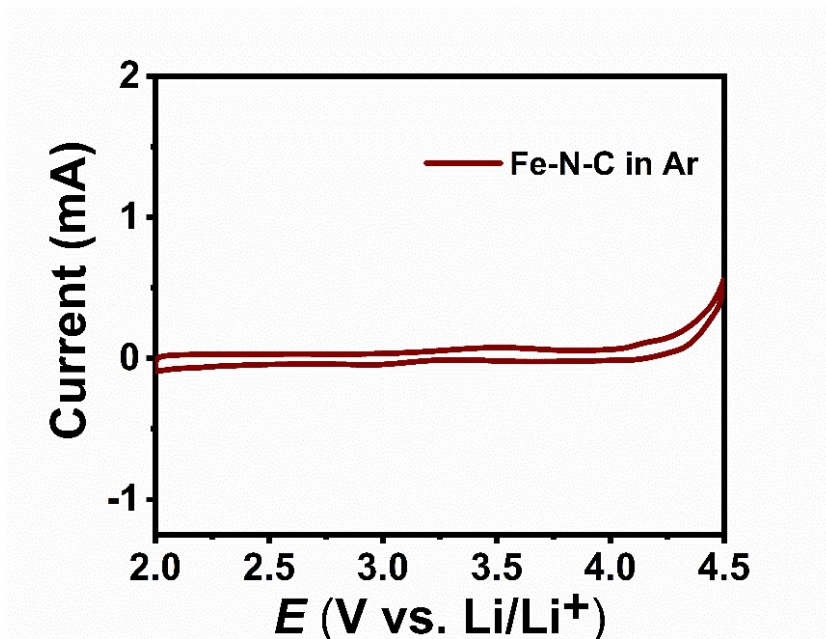

Figure S7. CV curve of the Fe-N-C cathode under Ar atmosphere.

**Table S1.** The performance comparison of the Li-CO<sub>2</sub> batteries with different reported catalysts.

| Cathode Catalyst                                               | Capacity (mAh g <sup>-1</sup> )     | Cycle life (Current density)               | References |
|----------------------------------------------------------------|-------------------------------------|--------------------------------------------|------------|
| Fe-N-C                                                         | 13238 (0.2 A g <sup>-1</sup> )      | 140 cycles (0.2 A g <sup>-1</sup> )        | This work  |
| AuNPs/CNTs                                                     | 6399 (0.1 A g <sup>-1</sup> )       | 46 cycles (0.2 A g <sup>-1</sup> )         | 1          |
| Co-N-CNTs                                                      | 6042 (0.2 A g <sup>-1</sup> )       | 92 cycles (0.4 A g <sup>-1</sup> )         | 2          |
| RuO <sub>2</sub> /LDO                                          | 5455 (0.1 A g <sup>-1</sup> )       | 60 cycles (166 mA g <sup>-1</sup> )        | 3          |
| BN-GN vdWsh                                                    | 14319 (0.1 A g <sup>-1</sup> )      | 70 cycles (0.1 A g <sup>-1</sup> )         | 4          |
| Cu-NG                                                          | 14864 (0.2 A g <sup>-1</sup> )      | 50 cycles (0.2 A g <sup>-1</sup> )         | 5          |
| GNPs/ $\beta$ -Mo <sub>2</sub> C                               | 14000 (0.1 A g <sup>-1</sup> )      | 17 cycles (0.1 A g <sup>-1</sup> )         | 6          |
| Mn <sub>2</sub> O <sub>3</sub> -Mn <sub>3</sub> O <sub>4</sub> | 19024 (0.1 A g <sup>-1</sup> )      | 69 cycles (0.1 A g <sup>-1</sup> )         | 7          |
| Ru@super P                                                     | 8299 (0.1 A g <sup>-1</sup> )       | 80 cycles (0.1 A g <sup>-1</sup> )         | 8          |
| Ru-Cu-G                                                        | 13698 (0.2 A g <sup>-1</sup> )      | 100 cycles (0.2 A g <sup>-1</sup> )        | 9          |
| CNT@RuO <sub>2</sub>                                           | 2187 (0.05 A g <sup>-1</sup> )      | 30 cycles (0.1 A g <sup>-1</sup> )         | 10         |
| Ir/C Nanofiber                                                 | 18813 (0.1 A g <sup>-1</sup> )      | 120 cycles (20 $\mu$ A)                    | 11         |
| MnCO <sub>3</sub>                                              | 11110 (0.05 A g <sup>-1</sup> )     | 25 cycles (0.2 A g <sup>-1</sup> )         | 12         |
| Mn <sub>2</sub> (dobdc)                                        | 18022 (0.05A g <sup>-1</sup> )      | 50 cycles (0.2 A g <sup>-1</sup> )         | 13         |
| Porous Mn <sub>2</sub> O <sub>3</sub>                          | 9434 (0.05 A g <sup>-1</sup> )      | 45 cycles (0.05 A g <sup>-1</sup> )        | 13         |
| adjacent Co/GO                                                 | 17358 (0.1 A g <sup>-1</sup> )      | 100 cycles (0.1 A g <sup>-1</sup> )        | 14         |
| N-CNTs@Ti                                                      | 9292 (0.05 A g <sup>-1</sup> )      | 25 cycles (0.05 A g <sup>-1</sup> )        | 15         |
| CNTs                                                           | 8379 (0.05 A g <sup>-1</sup> )      | 29 cycles (0.1 A g <sup>-1</sup> )         | 16         |
| GN                                                             | 5139 (0.05 A g <sup>-1</sup> )      | 20 cycles (0.05 A g <sup>-1</sup> )        | 17         |
| Ru/ACNFs                                                       | 11495 (0.1 A g <sup>-1</sup> )      | 50 cycles (0.1 A g <sup>-1</sup> )         | 18         |
| Mo <sub>2</sub> C/CNT cloth                                    | 3415 (50 $\mu$ A cm <sup>-2</sup> ) | 20 cycles (100 $\mu$ Ah cm <sup>-2</sup> ) | 19         |

## References

1. Y. Kong, H. Gong, L. Song, C. Jiang, T. Wang and J. He, *Eur. J. Inorg. Chem.*, 2021, **2021**, 590-596.
2. L. Song, T. Wang, C. Wu, X. Fan and J. He, *Chem. Commun.*, 2019, **55**, 12781-12784.
3. S.-M. Xu, Z.-C. Ren, X. Liu, X. Liang, K.-X. Wang and J.-S. Chen, *Energy Storage Mater.*, 2018, **15**, 291-298.
4. Z. Sun, D. Wang, L. Lin, Y. Liu, M. Yuan, C. Nan, H. Li, G. Sun and X. Yang, *Nano Res.*, 2021, 1-7.
5. Z. Zhang, Z. Zhang, P. Liu, Y. Xie, K. Cao and Z. Zhou, *J. Mater. Chem. A*, 2018, **6**, 3218-3223.
6. M. Wu, J. Y. Kim, H. Park, D. Y. Kim, K. M. Cho, E. Lim, O. B. Chae, S. Choi, Y. Kang and J. Kim, *ACS Appl. Mater. Interfaces*, 2020, **12**, 32633-32641.
7. L. Liu, L. Zhang, K. Wang, H. Wu, H. Mao, L. Li, Z. Sun, S. Lu, D. Zhang and W. Yu, *ACS Appl. Mater. Interfaces*, 2020, **12**, 33846-33854.
8. S. Yang, Y. Qiao, P. He, Y. Liu, Z. Cheng, J.-j. Zhu and H. Zhou, *Energy Environ. Sci.*, 2017, **10**, 972-978.

9. Z. Zhang, C. Yang, S. Wu, A. Wang, L. Zhao, D. Zhai, B. Ren, K. Cao and Z. Zhou, *Adv. Energy Mater.*, 2019, **9**, 1802805.
10. S. Bie, M. Du, W. He, H. Zhang, Z. Yu, J. Liu, M. Liu, W. Yan, L. Zhou and Z. Zou, *ACS Appl. Mater. Interfaces*, 2019, **11**, 5146-5151.
11. C. Wang, Q. Zhang, X. Zhang, X. G. Wang, Z. Xie and Z. Zhou, *Small*, 2018, **14**, 1800641.
12. S. Li, Y. Dong, J. Zhou, Y. Liu, J. Wang, X. Gao, Y. Han, P. Qi and B. Wang, *Energy Environ. Sci.*, 2018, **11**, 1318-1325.
13. W. Ma, S. Lu, X. Lei, X. Liu and Y. Ding, *J. Mater. Chem. A*, 2018, **6**, 20829-20835.
14. B. W. Zhang, Y. Jiao, D. L. Chao, C. Ye, Y. X. Wang, K. Davey, H. K. Liu, S. X. Dou and S. Z. Qiao, *Adv. Funct. Mater.*, 2019, **29**, 1904206.
15. Y. Li, J. Zhou, T. Zhang, T. Wang, X. Li, Y. Jia, J. Cheng, Q. Guan, E. Liu and H. Peng, *Adv. Funct. Mater.*, 2019, **29**, 1808117.
16. C. Li, Z. Guo, B. Yang, Y. Liu, Y. Wang and Y. Xia, *Angew. Chem. Int. Ed.*, 2017, **56**, 9126-9130.
17. Z. Zhang, Q. Zhang, Y. Chen, J. Bao, X. Zhou, Z. Xie, J. Wei and Z. Zhou, *Angew. Chem.*, 2015, **127**, 6650-6653.
18. Y. Qiao, S. Xu, Y. Liu, J. Dai, H. Xie, Y. Yao, X. Mu, C. Chen, D. J. Kline, E. M. Hitz, B. Liu, J. Song, P. He, M. R. Zachariah and L. Hu, *Energy Environ. Sci.*, 2019, **12**, 1100-1107.
19. J. Zhou, X. Li, C. Yang, Y. Li, K. Guo, J. Cheng, D. Yuan, C. Song, J. Lu and B. Wang, *Adv. Mater.*, 2019, **31**, 1804439.
